# Supplementary material for: Regulation of metabolic gene clusters in Arabidopsis thaliana
Source: PubMed Central journal article supplement (PMC4301183; doi:10.1111/nph.13189), 2014-11-21
Supplement: nph0205-0503-sd1.pdf [file nph0205-0503-sd1.pdf]

## ***New Phytologist* Supporting Information**

Article title: **Regulation of metabolic gene clusters in *Arabidopsis thaliana***

Authors: Hans-Wilhelm Nützmann and Anne Osbourn

Article acceptance date: 23 October 2014

The following Supporting Information is available for this article:

**Fig. S1** Relative transcript level of the thalianol and marneral cluster genes in RNA preparations from leaf and root tissue of the Col-0 wild type.

**Fig. S2** GC-MS analysis of Col-0 and *arp6* root extracts.

**Fig. S3** Relative transcript levels of the thalianol and marneral cluster genes in *Ler* wild type and corresponding *arp6* mutant line.

**Fig. S4** ChIP analysis of H2A.Z abundance at the marneral gene cluster and control loci.

**Tables S1** *A. thaliana* mutant lines

**Tables S2** Oligonucleotides

**Fig. S1** Relative transcript level of the thalianol and marneral cluster genes in RNA preparations from leaf and root tissue of the Col-0 wild type.

(a) Thalianol gene cluster

(b) Marneral gene cluster

Black bars indicate cluster genes and grey bars indicate flanking genes. Gene expression level was measured by qRT-PCR and leaf transcript level rate was set as 1. *PP2AA3* (*At1g13320*) was used as internal control (Hong *et al.*, 2010). Error bars indicate standard deviation of three biological replicates.

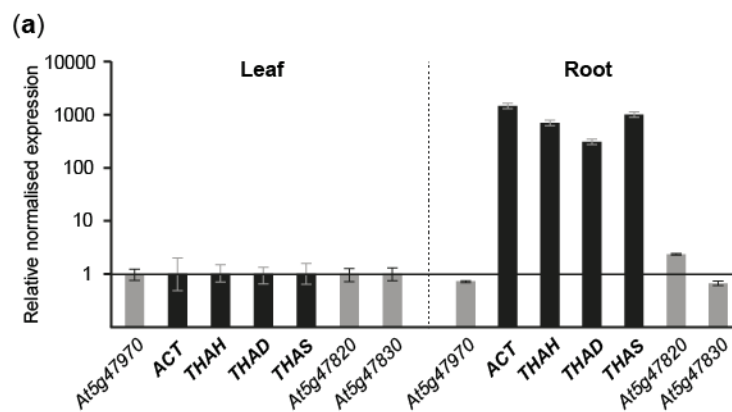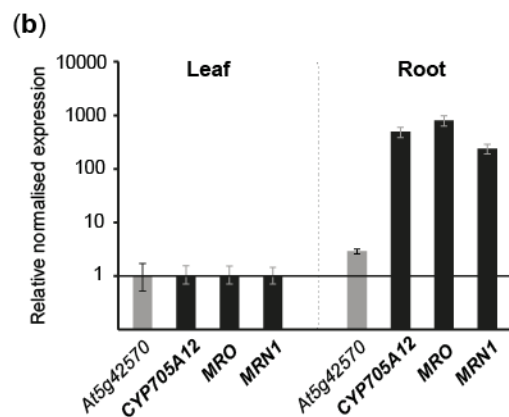

**Fig. S2** GC-MS analysis of Col-0 and *arp6* root extracts.

Extracted ion chromatograms ( $m/z$  229) for Col-0 and *arp6* root extracts are shown. The thalianol, coprostanol and sitosterol peaks are indicated.

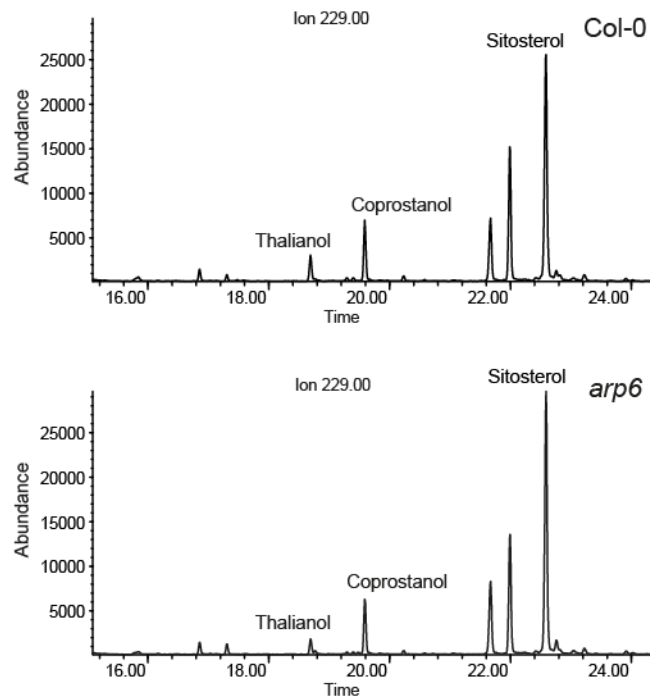

**Fig. S3** Relative transcript levels of the thalianol and marneral cluster genes in *Ler* wild type and corresponding *arp6* mutant line.

Transcript levels were measured by qRT-PCR and wild type transcript rate was set as 1. *PP2AA3* (*At1g13320*) was used as internal control (Hong *et al.*, 2010). Error bars indicate standard deviation of three biological replicates.

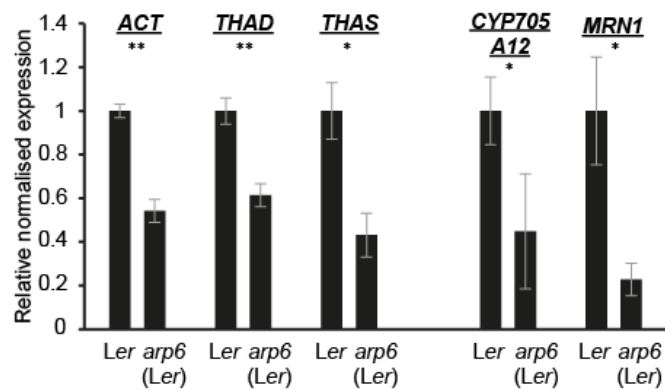

**Fig. S4** ChIP analysis of H2A.Z abundance at the marneral gene cluster and control loci.

H2A.Z abundance within the marneral gene cluster was measured in chromatin preparations from root and leaf tissue of *A. thaliana* by ChIP coupled to qRT-PCR. The cluster is transcribed in the roots and silent in the leaves. H2A.Z abundance was quantified relative to *FLC*. The probes used for this analysis are indicated in the map of the marneral cluster. Error bars indicate standard deviation of three biological replicates. Asterisks indicate statistical significance (*t*-test; \*,  $P < 0.05$ ; \*\*,  $P < 0.01$ ).

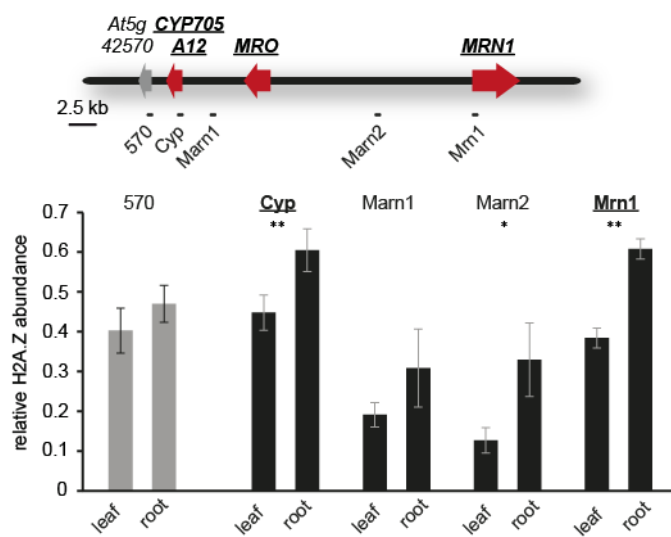

**Table S1** *A. thaliana* mutant lines

The *A. thaliana* mutant lines were chosen based on described chromatin regulatory function of the disrupted genes. Special emphasis was given to lines that are affected in their histone modifications and structure.

| <b>Line</b>         | <b>Gene function</b>                     | <b>Reference</b>                                          |
|---------------------|------------------------------------------|-----------------------------------------------------------|
| <i>atxr7</i>        | histone methyltransferase                | Tamada <i>et al.</i> , 2009                               |
| <i>suvh2</i>        | histone methyltransferase                | Naumann <i>et al.</i> , 2005                              |
| <i>atx1</i>         | histone methyltransferase                | Pien <i>et al.</i> , 2008                                 |
| <i>ref6</i>         | histone demethylase                      | Noh <i>et al.</i> , 2004; Lu <i>et al.</i> , 2011         |
| <i>atjmj4</i>       | histone demethylase                      | Noh <i>et al.</i> , 2004                                  |
| <i>elf6</i>         | histone demethylase                      | Noh <i>et al.</i> , 2004; Jeong <i>et al.</i> , 2009      |
| <i>hda6</i>         | histone deacetylase                      | Murfett <i>et al.</i> , 2001; Probst <i>et al.</i> , 2004 |
| <i>vim1</i>         | binds to methylated DNA                  | Woo <i>et al.</i> , 2007                                  |
| <i>prmt5</i>        | histone arginine methyltransferase       | Pei <i>et al.</i> , 2007                                  |
| <i>prmt10</i>       | histone arginine methyltransferase       | Niu <i>et al.</i> , 2007                                  |
| <i>otld1</i>        | histone deubiquitinase                   | Krichevsky <i>et al.</i> , 2011                           |
| <i>vin3-8</i>       | subunit of the polycomb response complex | Sung & Amasino, 2004; Bond <i>et al.</i> , 2009           |
| <i>arp6</i> (Col-0) | subunit of SWR1 complex                  | Deal <i>et al.</i> , 2007                                 |
| <i>haf1</i>         | histone acetyltransferase                | Crane & Gelvin, 2007                                      |
| <i>hda18</i>        | histone deacetylase                      | Xu <i>et al.</i> , 2005                                   |

**Table S2** Oligonucleotides

## qRT-PCR

| Oligo     | Forward                   | Reverse                       |
|-----------|---------------------------|-------------------------------|
| AT1G13320 | GTTGTGGAGAACATGATACGG     | GCTAGACATCATCACATTGTC         |
| AT5G42570 | GGTTTCTTATGGAGTATGATAGGTT | TTCTTTCCCTCAGGACT             |
| CYP705A12 | CCACAAACTACTCCGACCAC      | CTTCTTCTTCGCCTTACCTTG         |
| MRO       | ATCACGAAATCTGCCATAAA      | CTTCCAGCGTCTCCATCAATA         |
| MRN       | ATGCTTGCTTGTGGGTAGAA      | TTTGCGGCTAACATAACTTGG         |
| AT5G47970 | GGATACCAACGAGACCTGTG      | CATCACATCTTTGTAGCTGCATG       |
| ACT       | CGGCCATACTAACACTACT       | TGCCTACCCATACTTCAACAG         |
| THAD      | ATCCTGATTTCTGGGAAGACC     | TGTTGCACCATCATTCCAATT         |
| THAH      | TGGTGTTTGGAGGTGGAGTGA     | GGGAAATCTTGATAGGCAGTC         |
| THAS      | CTTCAATCCACTATGGCACTC     | TAAAATAATCACTCTTAGGGTCTT<br>C |
| AT5G48020 | TTACAACGAGGAAGGGACGAT     | ACCGGAACCTTAACCGCAACC         |
| AT5G48030 | GACAGCGTGAAGTCTTGAG       | CACTGGGAAGATCCAGTTGC          |

## ChIP

| Oligo     | Forward                   | Reverse                |
|-----------|---------------------------|------------------------|
| AT5G42570 | GACCGACACAACAAACAACAC     | GAAGGATCAGTGCCATTTCCG  |
| AT5G42580 | GCAGAACTCATCATCGTTGAC     | GACCGATGATTGGTAGAGAAG  |
| MRO       | CGATACACCCAAAATCAAATC     | GTTAGGAAAGTGGTTAAGCAC  |
| MRN       | CACGTTAACCAGTTAGCAGATTG   | GTTGGCATCAAACCTCCAGATC |
| AT5G47970 | GAGGCGATAGAAATGACTTAGTTG  | GACCCACTTTCGTTGGTGTTT  |
| ACT       | TCAAGCTTAACCAATATCACGTG   | CGATGACTGATAGTTGAAGGC  |
| THAD      | GAAAAGTCTTCATCTTCTCC      | GATTGGTAATGAAGGAGGGCTC |
| THAH      | TAAGAGAAGTGTACTTGATATTCGG | CGACTGCTTAACCTACCTTTG  |
| THAS      | GTCCAAGTAAACTTAGAGCAACC   | CTGCGTTGGCATCAAATTCC   |

|           |                          |                               |
|-----------|--------------------------|-------------------------------|
| AT5G48020 | CAATGATGAATGAACAATGGAG   | CAGTAGTGACCAGTTCTGTAG         |
| AT5G48030 | CTAGGGTTTTAACTTTGGCTGC   | CCATTGGAAGGGACCATTTTC         |
| Thal1     | GATGAAGAGTGGCATGAGGC     | CGAAAGGCATGTCTTCGCTC          |
| Thal2     | GTTATCCGACTCATGCAATGC    | GCATAGTGAAGACAGAGAGTTG        |
| Thal3     | CATGATTACCTGTTAGAGGAG    | GTCAACGCAACAGAGAATTC          |
| Thal4     | CAACGTGATTTTATTCTTATGG   | GTATTGAAAACACCCGTTAAG         |
| Thah2     | GAAGTATTTTCAATGGGGCAATAC | GTTGGAAGTTTCATCTTTGAATAC<br>C |
| Thal5     | GATACCTAGAAGGATTCCACG    | CTTTTGCCTTCCAACCTATAG         |
| Thal6     | CATCTTTTGGCAAGTTTCACTCTC | GATTCATGAAGCACATGGTCG         |
| Thas2     | CACATGTTCTCAGAGAGTATC    | CACAACGACTACCTTTGGCAG         |
| Thas3     | CCTGGATAAGAGAACAAGTGC    | CTTGTACTCTTTGAACACATTCAAC     |

#### Nucleosome Positioning

| Oligo             | Forward                      | Reverse                       |
|-------------------|------------------------------|-------------------------------|
| THASnupo1         | GATGACAATGCGAAACGTAGTTG      | CACGATGCATGTGAGAAACGG         |
| THASnupo2         | CGTTAAGGAATAAAATTATTTG       | CCACAAAATACGTAGAAAAG          |
| <b>THASnupo3</b>  | <b>CACACCCGTTTCTCACATGC</b>  | <b>CATCAACCACAAAATACGTAG</b>  |
| THASnupo4         | CTTTTCTACGTATTTTTGTGG        | AACAATGTGTTAGTTTTGAG          |
| THASnupo5         | GGTTGATGTTTAAAATTTTAC        | TGGTTTGTGTTGAGTTATAATAG       |
| THASnupo6         | CTCAAACTAACACATTGTT          | GTTTTCAAATTTTAATACAAACC       |
| THASnupo7         | CTATTATAACTCAAACAAACCA       | CTTGCAATTAATATGTTTTCA         |
| THASnupo8         | CATTTACATAATAGAAATCATC       | CGCTTCGTATTTTTTATAGTCG        |
| THASnupo9         | GGTTTGTATTAAAATTTGAAAAC      | GGACAAGGAGGACACATTAT          |
| THASnupo10        | CCTAAAACATCGACTATAAAA        | CAGCCTCCACATTTTGTAAGG         |
| THASnupo11        | GTATAATGTGTCCTCCTTGTC        | GTTGGTGGTGAACAGGTGAG          |
| <b>THASnupo12</b> | <b>CCTTACAAAATGTGGAGGCTG</b> | <b>GCATCAAATTCCTCAAATCTGC</b> |
| THASnupo13        | GGAGAGGATACTCACCTGTTC        | GAATTTGTGCCGAGCATCCTC         |



|                   |                                      |                              |
|-------------------|--------------------------------------|------------------------------|
| THASnupo14        | CTATGCAGGGAGGCAGATTTG                | GTAGTCTTGAAACGTGACGTG        |
| THASnupo15        | CACAAGAAATTGCCGAGGTAG                | CAAAGTATTTACCTGCATGC         |
| 47970nupo1        | CTGAACTCGTTTCTTGAAAACC               | GCAATTTCAATCAGAAGATAG        |
| 47970nupo2        | CGATCAAGACTACCTTGAACAC               | CCTCTAAAATCTATAAGCTTGTG      |
| 47970nupo3        | CTGAAATTTTGACATCGTTCAC               | CTCCTCTTCTTATTACATCAGAG      |
| 47970nupo4        | GAGGCGATAGAAATGACTTAGTTG             | GATGCTTCACAAGTCGCAAC         |
| <b>47970nupo5</b> | <b>GAGGAGAGATCTAAAAGATGAAA<br/>G</b> | <b>GACCCACTTTCGTTGGTGTTC</b> |
| 47970nupo6        | CTTGTGAAGCATCGGGAGAC                 | GAATGACGTCAAAAAGGAATG        |
| 47970nupo7        | GTCCCGCCTTTTGTTTCCTT                 | GACGAGAGAGGGTGAAATTGG        |
| 47970nupo8        | GCAAATCTCAGCGACCACAA                 | GACGAATACAGGCAGCTATAG        |
| <b>47970nupo9</b> | <b>GTGTTCTTGTCTGAAACTCG</b>          | <b>GTTGGTAAATCTCAGCTTCTC</b> |
| 47970nupo10       | GACCAGCAGTGTCCCATATC                 | CAGTATCGAATCTAAAGCAACG       |
| 47970nupo11       | CTAAAACAAGGATCTACGATGG               | CAAGAACACTTGAAATCGATCG       |
| 47970nupo12       | GCGACTGCCAAGCGAAATTC                 | GACACTGCTGGTCAAGAACG         |
| THADnupo1         | CATTGATCAATGCATGGGATC                | GATCATTGATGCCATTGTTGC        |
| THADnupo2         | GGCTACTCTGTGTCATTTGC                 | CATAAGAGGAGGAAGATGAAG        |
| THADnupo3         | CAATGGCATCAATGATCACTG                | CTGAAGAAAAGATCGTAAGAG        |
| <b>THADnupo4</b>  | <b>CATCTTCCTCCTCTTATGTC</b>          | <b>GAGCACAGCCAGCTCGTGAG</b>  |
| THADnupo5         | CTTACGATCTTTTCTTCAGG                 | GGTGAAGATGACCAATGATTG        |
| <b>THADnupo6</b>  | <b>GAGAAAACATATTATATTTAGG</b>        | <b>GCAAATGACACAGAGTAGCC</b>  |
| THADnupo7         | CTTAAAAAGTAATGACGTCAGC               | CATGCATTGATCAATGATCAG        |
| THADnupo8         | GTGCTTGTCCCAGAGAACAAC                | GATCAGGCTTTGTTTATTACC        |
| THADnupo9         | CCAATGTGAATGCTATAACG                 | GAAAGCTGACGTCATTACT          |
| THADnupo10        | GACACTCTTTATTTTATTATC                | CTGGGACAAGCACAATCGAG         |
| THADnupo11        | CAGATGTTTAAAATGTCTCT                 | CATTGGTTAATTTTGAAGG          |
| THADnupo12        | GGTGTCTTTAGTATAAATTAG                | GATAATAAAATAAAGAGTGTC        |
| THADnupo13        | CCAATAAGTCCCAACATCCAC                | AGAGACATTTTAAACATCTG         |

|                   |                             |                               |
|-------------------|-----------------------------|-------------------------------|
| THADnupo14        | GTAAGTTGAAACCTCTATAGC       | CTAATTTATACTAAAGACACC         |
| THADnupo15        | GACATTCACAACCTTCTACAG       | GGACTTATTGGTTTGAGTGG          |
| THADnupo16        | CAATTTTAACATAATTTATATTC     | GATTAGTAACTAAAACTGTAG         |
| THADnupo17        | TTGTTACTATGTTGCAAC          | CTGTAGAAGTTGTGAATGTC          |
| THAL6nupo2        | GAATAGGAATATGAAAAAAGTG      | GATAGGTAGAGATGATCATACC        |
| THAL6nupo3        | CACAGTAGAATCCATACTCAC       | GTGAAACTTGCCAAAAGATG          |
| THAL6nupo4        | CGTTGCAACTTACAACCATAC       | CCTATTCACCTTACGATGATG         |
| <b>THAL6nupo5</b> | <b>GACTAGAAAAACGTGGGACC</b> | <b>GACTTCTAAGAGGTAAAGAGG</b>  |
| THAL6nupo6        | CAAATATTCAAGTTTCCCGGAC      | GTTGTAAGTTGCAACGCCATG         |
| THAL6nupo7        | GCAATCACTTGAGTGAAAAC        | GTCTTTCGATGATTAGTACG          |
| THAL6nupo8        | CAATTAGTGATGCTTGAGCTAG      | CCACAATATTTTTATGTTTTG         |
| THAL1nupo1        | CTTTCAAAGATGCATCTGTTGC      | GACGCAACTGATTTTTTTGTAGC       |
| THAL1nupo2        | GAGATGAAGAGTGGCATGAGG       | CAGAGTTAGCTAATAATATGGC        |
| THAL1nupo3        | GCTACAAAAAATCAGTTGCGTC      | GCTCAGATCTTTCCAATGTG          |
| THAL1nupo4        | CTAACTCTGAAGTTACAAATCC      | GTAACTTCCTATGCTCGAAAG         |
| THAL1nupo5        | CACATTGGAAAGATCTGAGCG       | CTCCATTACACTATAACACTGC        |
| THAL1nupo6        | GGAAGTTAACTAATTTAAATG       | GTTGGAATAATCAACAAATGAC        |
| THAL1nupo7        | GTGTAATGGAGTTCGAGTC         | CTTGGTTGATAAACTGTAGC          |
| <b>THAL1nupo8</b> | <b>GTTGATTATTCCAACATGCC</b> | <b>CTTCATGCAATCGAACTTTATC</b> |
| THAL1nupo9        | CCAAGTTATATAACCCAATG        | CATCGTTTATGTTCTCCACTTC        |
| THAHnupo1         | CAAAGGTGTTTACAACCTTC        | CCTCTTCATTTTCAAATGT           |
| THAHnupo2         | TTGAAACTATATAGTATCATG       | CTTGGTAAGTACTGGAACCTC         |
| THAHnupo3         | ACATTTTGAAAATGAAGAGG        | CACCCCACTTTTGACAAATC          |
| THAHnupo4         | GTACTIONACCAAGTTTTAAAAC     | GAAAAGTTGTGTCTCACAAAG         |
| THAHnupo5         | GATTTGTCAAAGTGGGGTGC        | GGTTAATATATTTCTTCAGG          |
| THAHnupo6         | GAGACACAACCTTTTCTTCATAG     | CAAGTACACTTCTCTTATAACC        |
| THAHnupo7         | TGAGTAACACTATCCTGAAG        | CAAATTATACCTAGTTTTTGG         |

|                   |                             |                              |
|-------------------|-----------------------------|------------------------------|
| THAHnupo8         | GTATAGGTTATAAGAGAAGTG       | CACCTCAACTTAGACCTAG          |
| THAHnupo9         | CCAAAACTAGGTATAATTTG        | CAAATAACTTTTATACTAGACC       |
| THAHnupo10        | CTAGGTCTAAGTTGAGGTG         | CAACGACTGCTTAACCTACC         |
| THAHnupo11        | GGTCTAGTATAAAGTTATTTG       | GTCATTACAAACAAACAACCTC       |
| THAHnupo12        | CCAAAGGTAGGTTAAGCAGTC       | GAATAATCTTAACCTACCTATG       |
| THAHnupo13        | GTCTGCACTCTGCAAAAAAC        | TAGTTTCATGAAGAAGGTTG         |
| THAHnupo14        | GTATACTATACATGTTAACG        | GTAAACACCTTTTGTAATTGC        |
| THAHnupo15        | GTGAGCTTCTAACCTAAAATC       | GATAATATATGTTTTTTGCAG        |
| THAHnupo16        | GGTTGAGTATGTGCGGATCG        | CGTTAACATGTATAGTATAC         |
| THAHnupo17        | GTTATATTGAGTTGTTTGTTTG      | GACCACACGAAGCTCATTTG         |
| THAHnupo18        | CATAGGTAGGTTAAGATTATTC      | CAACAGCGGCTACAGCTATG         |
| <b>THAHnupo19</b> | <b>CAAATGAGCTTCGTGTGGTC</b> | <b>CATTGCACTTCGGGTTTCGAC</b> |
| <b>THAHnupo20</b> | <b>GTTTGGGCATGGATCGACG</b>  | <b>CTCTAATATGGTATCAGAGCC</b> |
| 07700nupo -1      | CACATTCCTCAGCCGTTGATG       | CTATCTCCCAGCTAGCAACC         |

Bold, oligos used for stably positioned nucleosomes in thalianol gene cluster.

## References

- Bond DM, Wilson IW, Dennis ES, Pogson BJ, Finnegan EJ. 2009.** *VERNALIZATION INSENSITIVE 3 (VIN3)* is required for the response of *Arabidopsis thaliana* seedlings exposed to low oxygen conditions. *Plant Journal* **59**(4): 576-587.
- Crane YM, Gelvin SB. 2007.** RNAi-mediated gene silencing reveals involvement of *Arabidopsis* chromatin-related genes in Agrobacterium-mediated root transformation. *Proceedings of the National Academy of Sciences, USA* **104**(38): 15156-15161.
- Deal RB, Topp CN, McKinney EC, Meagher RB. 2007.** Repression of flowering in *Arabidopsis* requires activation of *FLOWERING LOCUS C* expression by the histone variant H2A.Z. *Plant Cell* **19**(1): 74-83.
- Hong SM, Bahn SC, Lyu A, Jung HS, Ahn JH. 2010.** Identification and testing of superior reference genes for a starting pool of transcript normalization in *Arabidopsis*. *Plant Cell Physiology* **51**(10): 1694-1706.
- Jeong JH, Song HR, Ko JH, Jeong YM, Kwon YE, Seol JH, Amasino RM, Noh B, Noh YS. 2009.** Repression of *FLOWERING LOCUS T* chromatin by functionally redundant histone H3 lysine 4 demethylases in *Arabidopsis*. *PLoS One* **4**(11): e8033.
- Krichevsky A, Zaltsman A, Lacroix B, Citovsky V. 2011.** Involvement of KDM1C histone demethylase-OTLD1 otubain-like histone deubiquitinase complexes in plant gene repression. *Proceedings of the National Academy of Sciences, USA* **108**(27): 11157-11162.
- Lu FL, Cui X, Zhang SB, Jenuwein T, Cao XF. 2011.** *Arabidopsis* REF6 is a histone H3 lysine 27 demethylase. *Nature Genetics* **43**(7): 715-U144.
- Murfett J, Wang XJ, Hagen G, Guilfoyle TJ. 2001.** Identification of *Arabidopsis* histone deacetylase HDA6 mutants that affect transgene expression. *Plant Cell* **13**(5): 1047-1061.
- Naumann K, Fischer A, Hofmann I, Krauss V, Phalke S, Irmeler K, Hause G, Aurich AC, Dorn R, Jenuwein T et al. 2005.** Pivotal role of AtSUVH2 in heterochromatic histone methylation and gene silencing in *Arabidopsis*. *EMBO J* **24**(7): 1418-1429.
- Niu LF, Lu FL, Pei YX, Liu CY, Cao XF. 2007.** Regulation of flowering time by the protein arginine methyltransferase AtPRMT10. *EMBO R.* **8**(12): 1190-1195.
- Noh B, Lee SH, Kim HJ, Yi G, Shin EA, Lee M, Jung KJ, Doyle MR, Amasino RM, Noh YS. 2004.** Divergent roles of a pair of homologous jumonji/zinc-finger-class

- transcription factor proteins in the regulation of *Arabidopsis* flowering time. *Plant Cell* **16**(10): 2601-2613.
- Pei YX, Niu LF, Lu FL, Liu CY, Zhai JX, Kong XF, Cao XF. 2007.** Mutations in the type II protein arginine methyltransferase AtPRMT5 result in pleiotropic developmental defects in *Arabidopsis*. *Plant Physiology* **144**(4): 1913-1923.
- Pien S, Fleury D, Mylne JS, Crevillen P, Inze D, Avramova Z, Dean C, Grossniklaus U. 2008.** ARABIDOPSIS TRITHORAX1 dynamically regulates *FLOWERING LOCUS C* activation via histone 3 lysine 4 trimethylation. *Plant Cell* **20**(3): 580-588.
- Probst AV, Fagard M, Proux F, Mourrain P, Boutet S, Earley K, Lawrence RJ, Pikaard CS, Murfett J, Furner I et al. 2004.** *Arabidopsis* histone deacetylase HDA6 is required for maintenance of transcriptional gene silencing and determines nuclear organization of rDNA repeats. *Plant Cell* **16**(4): 1021-1034.
- Sung SB, Amasino RM. 2004.** Vernalization in *Arabidopsis thaliana* is mediated by the PHD finger protein VIN3. *Nature* **427**(6970): 159-164.
- Tamada Y, Yun JY, Woo SC, Amasino RM. 2009.** ARABIDOPSIS TRITHORAX-RELATED7 is required for methylation of lysine 4 of histone H3 and for transcriptional activation of *FLOWERING LOCUS C*. *Plant Cell* **21**(10): 3257-3269.
- Woo HR, Pontes O, Pikaard CS, Richards EJ. 2007.** VIM1, a methylcytosine-binding protein required for centromeric heterochromatinization. *Genes & Development* **21**(3): 267-277.
- Xu CR, Liu C, Wang YL, Li LC, Chen WQ, Xu ZH, Bai SN. 2005.** Histone acetylation affects expression of cellular patterning genes in the *Arabidopsis* root epidermis. *Proceedings of the National Academy of Sciences, USA* **102**(40): 14469-14474.
